# Supplementary material for: The Personal Computer and Entrepreneurship
Source: Atypon-hosted journal article supplement (doi:10.1287/mnsc.1050.0479), 2006-02-01
Supplement: mnsc.1050.0479-sm-fairle_companion.pdf [file mnsc.1050.0479-sm-fairle_companion.pdf]

# **The Personal Computer and Entrepreneurship**

Robert W. Fairlie  
University of California, Santa Cruz

January 2005

Figure 3  
Percent of Individuals with Access to Home Computer by Age  
Current Population Surveys, 1997-2001

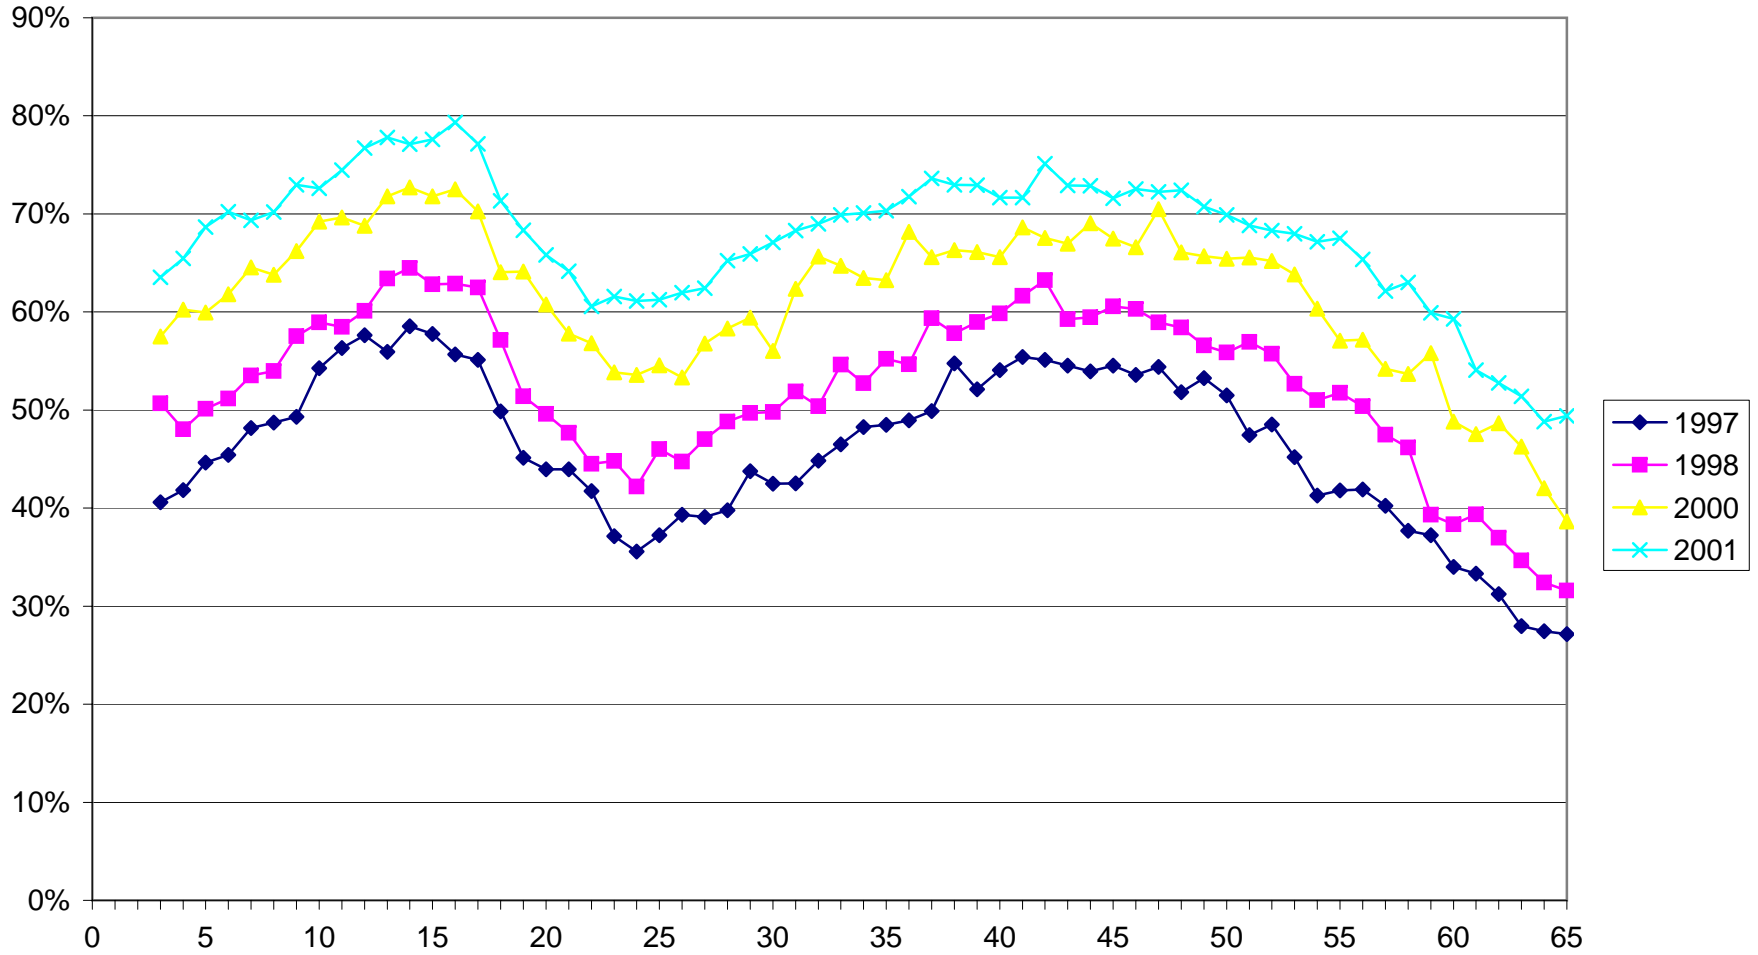

Table 3A  
 Additional Probit Regressions for Entrepreneurship - Men  
 Current Population Surveys (1997-2001)

| Explanatory Variables                  | (1)                 | (2)                 | (3)                 | (4)                 |
|----------------------------------------|---------------------|---------------------|---------------------|---------------------|
| Black                                  | -0.2193<br>(0.0563) | -0.2114<br>(0.0602) | -0.2196<br>(0.0566) | -0.2189<br>(0.0563) |
| Latino                                 | -0.2506<br>(0.0609) | -0.2739<br>(0.0665) | -0.2572<br>(0.0615) | -0.2504<br>(0.0609) |
| Native American                        | -0.1143<br>(0.1251) | -0.1313<br>(0.1359) | -0.1126<br>(0.1251) | -0.1143<br>(0.1251) |
| Asian                                  | -0.2036<br>(0.0773) | -0.1459<br>(0.0833) | -0.1964<br>(0.0775) | -0.2035<br>(0.0773) |
| Immigrant                              | 0.2141<br>(0.0506)  | 0.2248<br>(0.0552)  | 0.2099<br>(0.0509)  | 0.2141<br>(0.0506)  |
| Age                                    | 0.0153<br>(0.0092)  | 0.0190<br>(0.0100)  | 0.0143<br>(0.0093)  | 0.0153<br>(0.0092)  |
| Age squared                            | -0.0002<br>(0.0001) | -0.0002<br>(0.0001) | -0.0002<br>(0.0001) | -0.0002<br>(0.0001) |
| Number of children                     | -0.0588<br>(0.0249) | -0.0717<br>(0.0272) | -0.0581<br>(0.0251) | -0.0588<br>(0.0249) |
| Number of children squared             | 0.0157<br>(0.0057)  | 0.0182<br>(0.0062)  | 0.0158<br>(0.0058)  | 0.0157<br>(0.0057)  |
| Married                                | 0.1337<br>(0.0427)  | 0.1399<br>(0.0461)  | 0.1338<br>(0.0429)  | 0.1339<br>(0.0427)  |
| Previously married                     | 0.1664<br>(0.0540)  | 0.1481<br>(0.0582)  | 0.1592<br>(0.0545)  | 0.1667<br>(0.0541)  |
| High School graduate                   | 0.0664<br>(0.0504)  | 0.0763<br>(0.0533)  | 0.0678<br>(0.0506)  | 0.0658<br>(0.0505)  |
| Some college                           | 0.0681<br>(0.0527)  | 0.0645<br>(0.0563)  | 0.0683<br>(0.0529)  | 0.0668<br>(0.0530)  |
| College graduate                       | 0.0822<br>(0.0562)  | 0.0827<br>(0.0606)  | 0.0803<br>(0.0565)  | 0.0938<br>(0.0746)  |
| Graduate school                        | 0.1189<br>(0.0619)  | 0.1137<br>(0.0677)  | 0.1244<br>(0.0623)  | 0.1311<br>(0.0806)  |
| Family income: missing                 | 0.0493<br>(0.0833)  | 0.0824<br>(0.0895)  | 0.0461<br>(0.0833)  | 0.0488<br>(0.0833)  |
| Family income: \$10,000 to<br>\$15,000 | 0.0381<br>(0.0991)  | 0.0576<br>(0.1059)  | 0.0374<br>(0.0990)  | 0.0382<br>(0.0991)  |
| Family income: \$15,000 to<br>\$20,000 | 0.0560<br>(0.0977)  | 0.0965<br>(0.1035)  | 0.0476<br>(0.0980)  | 0.0561<br>(0.0977)  |
| Family income: \$20,000 to<br>\$25,000 | -0.0449<br>(0.0924) | 0.0047<br>(0.0981)  | -0.0457<br>(0.0924) | -0.0451<br>(0.0924) |

(continued)

Table 3A (continued)  
Additional Probit Regressions for Entrepreneurship - Men

| Explanatory Variables               | (1)                 | (2)                 | (3)                 | (4)                 |
|-------------------------------------|---------------------|---------------------|---------------------|---------------------|
| Family income: \$25,000 to \$30,000 | -0.0597<br>(0.0914) | -0.0164<br>(0.0976) | -0.0669<br>(0.0916) | -0.0600<br>(0.0914) |
| Family income: \$30,000 to \$35,000 | -0.1618<br>(0.0923) | -0.1468<br>(0.0996) | -0.1606<br>(0.0924) | -0.1621<br>(0.0924) |
| Family income: \$35,000 to \$40,000 | -0.1641<br>(0.0917) | -0.1082<br>(0.0976) | -0.1630<br>(0.0917) | -0.1645<br>(0.0917) |
| Family income: \$40,000 to \$50,000 | -0.1566<br>(0.0843) | -0.1656<br>(0.0918) | -0.1662<br>(0.0845) | -0.1573<br>(0.0844) |
| Family income: \$50,000 to \$60,000 | -0.1685<br>(0.0854) | -0.1511<br>(0.0926) | -0.1755<br>(0.0856) | -0.1693<br>(0.0854) |
| Family income: \$60,000 to \$75,000 | -0.2494<br>(0.0867) | -0.2486<br>(0.0946) | -0.2609<br>(0.0870) | -0.2500<br>(0.0867) |
| Family income: more than \$75,000   | 0.0720<br>(0.0808)  | 0.0933<br>(0.0877)  | 0.0640<br>(0.0809)  | 0.0718<br>(0.0808)  |
| Home owner                          | -0.0395<br>(0.0365) | -0.0303<br>(0.0395) | -0.0372<br>(0.0367) | -0.0395<br>(0.0365) |
| Access to a home computer           | 0.0541<br>(0.0311)  | 0.0470<br>(0.0332)  | 0.0445<br>(0.0313)  | 0.0578<br>(0.0348)  |
| Marginal effect                     | 0.0034              | 0.0029              | 0.0028              | 0.0036              |
| Home computer*college graduate      |                     |                     |                     | -0.0162<br>0.0689   |
| Mean of dependent variable          | 0.0299              | 0.0292              | 0.0295              | 0.0299              |
| Log Likelihood value                | -5,265.73           | -4,397.10           | -5,190.94           | -5,265.70           |
| Sample size                         | 39,972              | 34,055              | 39,824              | 39,972              |

Notes: (1) See notes to Table 2A. (2) Specification 2 removes individuals with newest home computer purchased in the first year surveyed. (3) Specification 3 excludes individuals with home computers owned by a home business.

Table 3B  
 Additional Probit Regressions for Entrepreneurship - Women  
 Current Population Surveys (1997-2001)

| Explanatory Variables                  | (1)                 | (2)                 | (3)                 | (4)                 |
|----------------------------------------|---------------------|---------------------|---------------------|---------------------|
| Black                                  | -0.1771<br>(0.0676) | -0.1910<br>(0.0734) | -0.1709<br>(0.0677) | -0.1767<br>(0.0676) |
| Latino                                 | -0.3265<br>(0.0812) | -0.3940<br>(0.0914) | -0.3237<br>(0.0815) | -0.3262<br>(0.0812) |
| Native American                        | -0.1140<br>(0.1414) | -0.1793<br>(0.1596) | -0.1105<br>(0.1413) | -0.1136<br>(0.1414) |
| Asian                                  | -0.3879<br>(0.1062) | -0.3531<br>(0.1151) | -0.4016<br>(0.1084) | -0.3881<br>(0.1062) |
| Immigrant                              | 0.1511<br>(0.0638)  | 0.1278<br>(0.0709)  | 0.1480<br>(0.0645)  | 0.1508<br>(0.0638)  |
| Age                                    | 0.0128<br>(0.0115)  | 0.0133<br>(0.0126)  | 0.0125<br>(0.0116)  | 0.0126<br>(0.0115)  |
| Age squared                            | -0.0001<br>(0.0001) | -0.0001<br>(0.0001) | -0.0001<br>(0.0001) | -0.0001<br>(0.0001) |
| Number of children                     | -0.0458<br>(0.0333) | -0.0370<br>(0.0370) | -0.0473<br>(0.0334) | -0.0455<br>(0.0333) |
| Number of children squared             | 0.0032<br>(0.0087)  | 0.0020<br>(0.0096)  | 0.0039<br>(0.0086)  | 0.0032<br>(0.0087)  |
| Married                                | 0.2401<br>(0.0606)  | 0.2870<br>(0.0674)  | 0.2434<br>(0.0611)  | 0.2414<br>(0.0607)  |
| Previously married                     | 0.1781<br>(0.0693)  | 0.1993<br>(0.0764)  | 0.1852<br>(0.0697)  | 0.1792<br>(0.0694)  |
| High School graduate                   | 0.0015<br>(0.0635)  | -0.0118<br>(0.0672) | 0.0062<br>(0.0640)  | 0.0002<br>(0.0636)  |
| Some college                           | -0.0583<br>(0.0663) | -0.0633<br>(0.0706) | -0.0502<br>(0.0668) | -0.0607<br>(0.0666) |
| College graduate                       | -0.0222<br>(0.0707) | -0.0438<br>(0.0764) | -0.0285<br>(0.0716) | 0.0060<br>(0.0972)  |
| Graduate school                        | 0.0290<br>(0.0796)  | 0.0730<br>(0.0857)  | 0.0396<br>(0.0804)  | 0.0582<br>(0.1058)  |
| Family income: missing                 | -0.0323<br>(0.0931) | -0.0207<br>(0.0991) | -0.0375<br>(0.0935) | -0.0339<br>(0.0932) |
| Family income: \$10,000 to<br>\$15,000 | -0.0686<br>(0.1105) | -0.0329<br>(0.1151) | -0.0642<br>(0.1104) | -0.0690<br>(0.1105) |
| Family income: \$15,000 to<br>\$20,000 | -0.0965<br>(0.1122) | -0.1168<br>(0.1203) | -0.1101<br>(0.1131) | -0.0968<br>(0.1122) |
| Family income: \$20,000 to<br>\$25,000 | -0.0054<br>(0.0996) | 0.0000<br>(0.1056)  | -0.0012<br>(0.0997) | -0.0064<br>(0.0997) |

(continued)

Table 3B (continued)  
Additional Probit Regressions for Entrepreneurship - Women

| Explanatory Variables               | (1)                 | (2)                 | (3)                 | (4)                 |
|-------------------------------------|---------------------|---------------------|---------------------|---------------------|
| Family income: \$25,000 to \$30,000 | -0.2486<br>(0.1084) | -0.2397<br>(0.1151) | -0.2416<br>(0.1084) | -0.2495<br>(0.1084) |
| Family income: \$30,000 to \$35,000 | -0.0879<br>(0.0998) | -0.0565<br>(0.1052) | -0.0804<br>(0.0998) | -0.0894<br>(0.0998) |
| Family income: \$35,000 to \$40,000 | -0.1945<br>(0.1042) | -0.2340<br>(0.1136) | -0.1985<br>(0.1048) | -0.1961<br>(0.1043) |
| Family income: \$40,000 to \$50,000 | -0.1591<br>(0.0941) | -0.1724<br>(0.1014) | -0.1542<br>(0.0943) | -0.1612<br>(0.0943) |
| Family income: \$50,000 to \$60,000 | -0.1645<br>(0.0952) | -0.1612<br>(0.1024) | -0.1605<br>(0.0955) | -0.1662<br>(0.0953) |
| Family income: \$60,000 to \$75,000 | -0.2646<br>(0.0979) | -0.2343<br>(0.1046) | -0.2601<br>(0.0982) | -0.2661<br>(0.0980) |
| Family income: more than \$75,000   | -0.0722<br>(0.0909) | -0.0939<br>(0.0981) | -0.0801<br>(0.0913) | -0.0732<br>(0.0909) |
| Home owner                          | 0.0754<br>(0.0478)  | 0.0346<br>(0.0510)  | 0.0709<br>(0.0480)  | 0.0754<br>(0.0478)  |
| Access to a home computer           | 0.1747<br>(0.0380)  | 0.1595<br>(0.0404)  | 0.1650<br>(0.0382)  | 0.1819<br>(0.0418)  |
| Marginal effect                     | 0.0055              | 0.0048              | 0.0051              | 0.0057              |
| Home computer*college graduate      |                     |                     |                     | -0.0369<br>0.0885   |
| Mean of dependent variable          | 0.0145              | 0.0137              | 0.0141              | 0.0145              |
| Log Likelihood value                | -3,472.56           | -2,858.49           | -3,393.54           | -3472.47            |
| Sample size                         | 47,261              | 40,604              | 47,015              | 47,261              |

Note: See notes to Table 3A.

Appendix A  
Sample Means and Standard Deviations for Main Analysis Variables  
Current Population Surveys (1997-2001)

|                                                              | Men     |           | Women   |           |
|--------------------------------------------------------------|---------|-----------|---------|-----------|
|                                                              | Mean    | Std. Dev. | Mean    | Std. Dev. |
| Entrepreneurship rate                                        | 0.0299  | 0.1702    | 0.0145  | 0.1193    |
| Black                                                        | 0.0818  | 0.2741    | 0.1038  | 0.3051    |
| Hispanic                                                     | 0.0880  | 0.2834    | 0.0840  | 0.2774    |
| Native American                                              | 0.0119  | 0.1086    | 0.0131  | 0.1136    |
| Asian                                                        | 0.0395  | 0.1948    | 0.0401  | 0.1963    |
| Immigrant                                                    | 0.1117  | 0.3150    | 0.1118  | 0.3151    |
| Age                                                          | 40.7680 | 11.0966   | 40.8964 | 10.8973   |
| Married                                                      | 0.6813  | 0.4660    | 0.6710  | 0.4698    |
| Previously married                                           | 0.0997  | 0.2996    | 0.1623  | 0.3687    |
| Number of children                                           | 0.9061  | 1.1511    | 0.9961  | 1.1752    |
| High School graduate                                         | 0.3248  | 0.4683    | 0.3325  | 0.4711    |
| Some college                                                 | 0.2802  | 0.4491    | 0.2994  | 0.4580    |
| College graduate                                             | 0.1895  | 0.3919    | 0.1918  | 0.3937    |
| Graduate school                                              | 0.0987  | 0.2983    | 0.0815  | 0.2736    |
| Family income: missing                                       | 0.0938  | 0.2915    | 0.0971  | 0.2961    |
| Family income: \$10,000 to \$15,000                          | 0.0325  | 0.1773    | 0.0430  | 0.2029    |
| Family income: \$15,000 to \$20,000                          | 0.0334  | 0.1797    | 0.0412  | 0.1987    |
| Family income: \$20,000 to \$25,000                          | 0.0493  | 0.2165    | 0.0547  | 0.2274    |
| Family income: \$25,000 to \$30,000                          | 0.0536  | 0.2252    | 0.0588  | 0.2353    |
| Family income: \$30,000 to \$35,000                          | 0.0595  | 0.2365    | 0.0612  | 0.2396    |
| Family income: \$35,000 to \$40,000                          | 0.0629  | 0.2429    | 0.0613  | 0.2400    |
| Family income: \$40,000 to \$50,000                          | 0.1131  | 0.3167    | 0.1044  | 0.3058    |
| Family income: \$50,000 to \$60,000                          | 0.1100  | 0.3129    | 0.1022  | 0.3029    |
| Family income: \$60,000 to \$75,000                          | 0.1191  | 0.3239    | 0.1067  | 0.3087    |
| Family income: more than \$75,000                            | 0.2404  | 0.4273    | 0.2222  | 0.4157    |
| Home owner                                                   | 0.7938  | 0.4046    | 0.7882  | 0.4086    |
| Access to a home computer                                    | 0.6201  | 0.4854    | 0.6125  | 0.4872    |
| Teenager present in household                                | 0.2863  | 0.4520    | 0.3184  | 0.4659    |
| Other household member uses<br>the Internet at work          | 0.2014  | 0.4010    | 0.2155  | 0.4112    |
| Other household member uses<br>the Internet outside the home | 0.3633  | 0.4810    | 0.3781  | 0.4849    |
| Sample Size                                                  | 39,972  |           | 47,261  |           |

Notes: See Notes to Table 1.

Appendix B  
Sample Entrepreneurship Rates by Exclusion Restrictions  
Current Population Surveys (1997-2001)

|                                                              | Entrepreneurship Rate |        |
|--------------------------------------------------------------|-----------------------|--------|
|                                                              | Men                   | Women  |
| Teenager present in household                                | 0.0286                | 0.0136 |
| No teenager present in household                             | 0.0306                | 0.0147 |
| Sample Size                                                  | 52,396                | 57,165 |
| Other household member uses the Internet at work             | 0.0304                | 0.0171 |
| No other household member uses the Internet at work          | 0.0299                | 0.0136 |
| Sample Size                                                  | 52,396                | 57,165 |
| Other household member uses the Internet outside the home    | 0.0326                | 0.0177 |
| No other household member uses the Internet outside the home | 0.0308                | 0.0128 |
| Sample Size                                                  | 35,306                | 38,467 |

Notes: See Notes to Table 1.
